# Supplementary material for: YTHDF2 suppresses the plasmablast genetic program and promotes germinal center formation
Source: PubMed Central journal article supplement (PMC9108551; doi:10.1016/j.celrep.2022.110778), 2022-05-06
Supplement: mmc1.pdf [file mmc1.pdf]

**Cell Reports, Volume 39**

**Supplemental information**

**YTHDF2 suppresses the plasmablast genetic  
program and promotes germinal center formation**

**Amalie Grenov, Hadas Hezroni, Lior Lasman, Jacob H. Hanna, and Ziv Shulman**

Figure S1

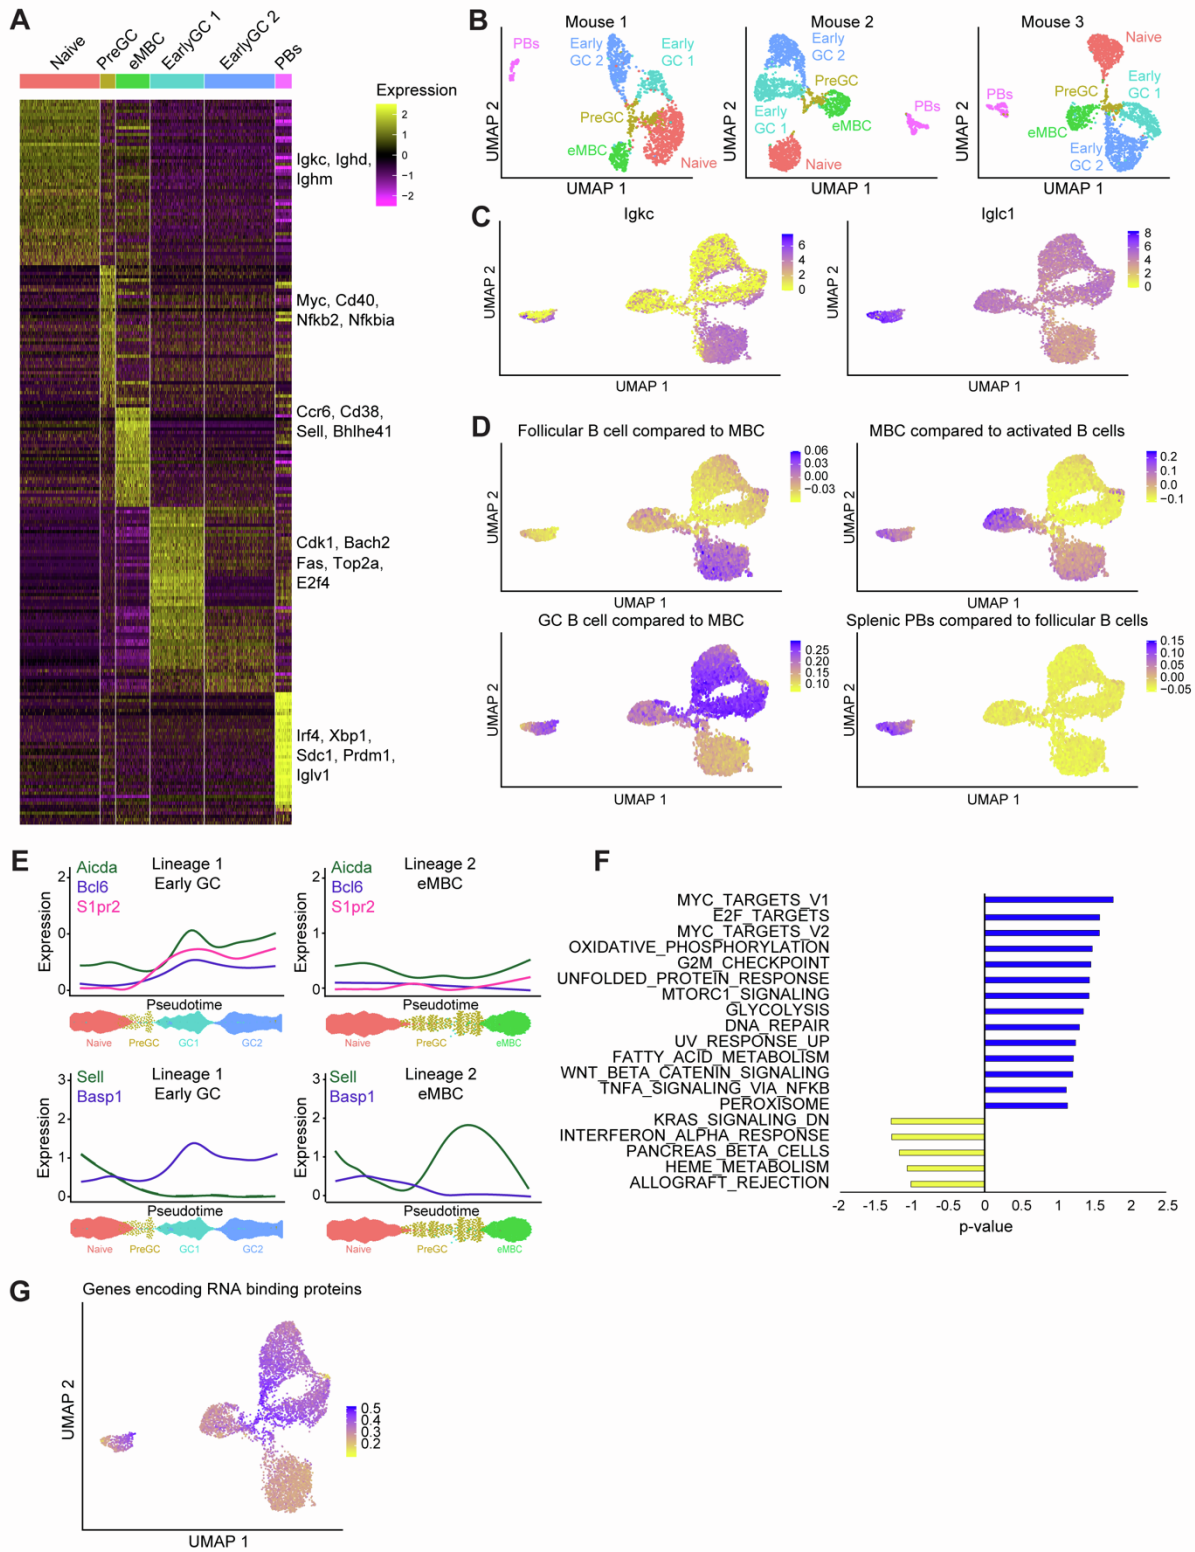

**Figure S1. Single cell RNA-seq analysis of antigen specific B cells during the early stages of the adaptive immune response, Related to Figure 1.** (A) Expression heatmap showing the top 50 upregulated genes for each cluster. (B) UMAP projections of scRNA-seq profiles of 1645, 2511, and 2260 transferred B1-8<sup>hi</sup> B cells isolated from 3 mice, 5 days after immunization. Clusters in the UMAP plots are color-coded according to different cell populations. Annotation of cell populations was done based on the same markers as in Figure 1. (C, D) UMAP projections of signature scores. Each signature consists of genes that are upregulated (FC > 2, padj < 0.05) in the indicated cell populations. RNA-seq samples were downloaded from Gene Expression Omnibus accession no. GSE174394 (follicular B cells, activated B cells, MBCs, GC B cells) and GSE60927 (splenic PBs, follicular B cells). (E) Expression of *Bcl6*, *Aicda*, *Slpr2*, *Sell* and *Baspl*, along the B cell differentiation trajectories defined in Figure 11. (F) Normalized enrichment scores of hallmark gene sets enrichment analysis of genes whose expression is significantly upregulated in the Pre-GC cluster compared to the Naive and eMBC cell clusters. (G) UMAP projections of RBPs gene signature scores.

Figure S2

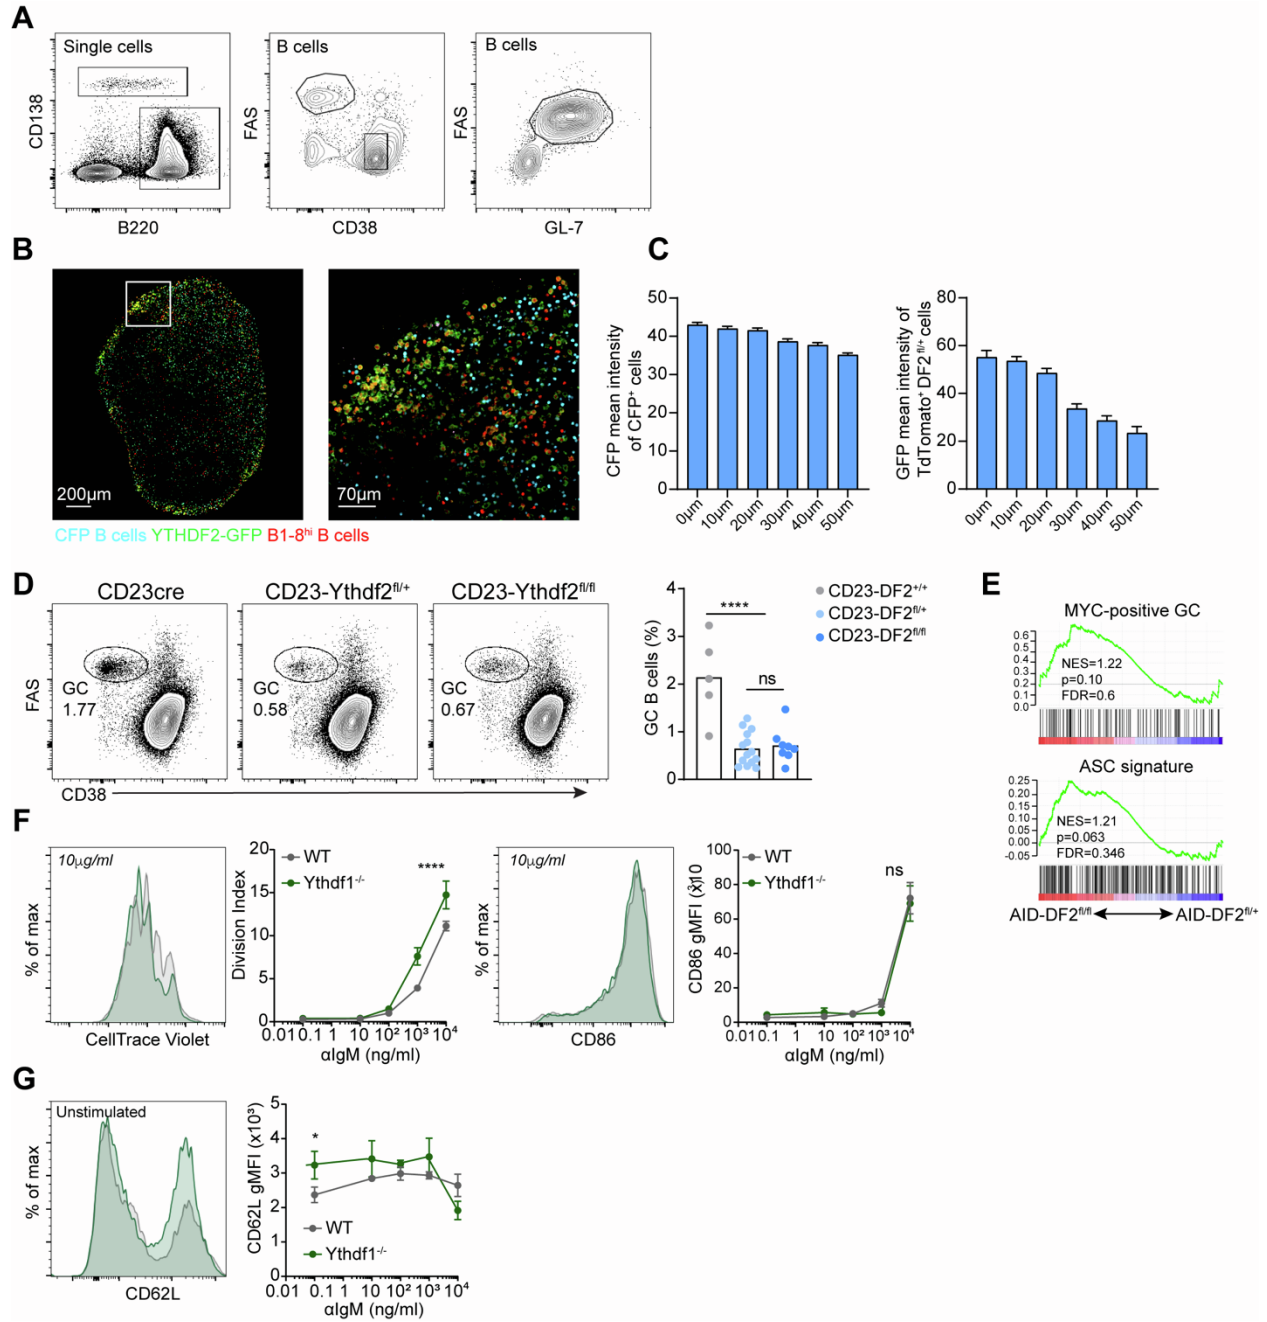

**Figure S2. YTHDF2 and YTHDF1 functions in the B cell immune response, Related to Figure 2, 3 and 6. (A)** Gating strategy for plasma cells and B cells (left), GC B cells, Naive B cells (middle), and FAS<sup>+</sup> GL-7<sup>+</sup> B cells (right). **(B-C)** Two-photon imaging of TdTomato<sup>+</sup> DF2<sup>fl/+</sup> B cells (transferred prior to immunization) and polyclonal CFP<sup>+</sup> naive B cells (transferred after immunization) three days after NP-KLH immunization. **(C)** Quantification of CFP and GFP mean fluorescence intensity measured in Z-stacks with 10µm increments from the LN cortex. **(D)** CD23-DF2<sup>+/+</sup>, CD23-DF2<sup>fl/+</sup>, CD23-DF2<sup>fl/fl</sup> mice were immunized with NP-KLH and analyzed for GC formation after 7 days by flow cytometry. Data were pooled from 5-14 independent mice. **(E)** GSEA analysis of Ythdf2-deficient GC LZ B cells from GSE180359, using gene signatures obtained from MYC-positive GC B cells: GSE39443, ASC: GSE60927. **(F, G)** Splenic cells from Ythdf1-deficient and WT mice were stained with CellTrace Violet and stimulated with increasing concentrations of anti-IgM for three days in vitro. CD86 expression, CellTrace Violet dilution and CD62L expression were assessed by flow cytometry. Plots are representative of three independent experiments. Dots represent mean±SD. Data were pooled from two independent experiments each with three samples per group. Statistical significance was tested using one-way ANOVA followed by Holm-Sidak's multiple comparisons test (A), two-way ANOVA followed by Sidak's multiple comparisons test (B, C), or using two-tailed unpaired Student's t-test. (D). \**P* < 0.05; \*\**P* < 0.01; \*\*\*\**P* < 0.001. NS, not significant.

**Table S1. List of primers for RT-qPCR, Related to Star Methods**

| <b>Primer Name</b> | <b>Organism</b> | <b>Primer sequence (5'-3')</b> |
|--------------------|-----------------|--------------------------------|
| Ubc_fwd            | Mouse           | GCCCAGTGTTACCACCAAGA           |
| Ubc_rev            | Mouse           | CCCATCACACCCAAGAACA            |
| Ythdf1_1_fwd       | Mouse           | ACAGTTACCCCTCGATGAGTG          |
| Ythdf1_1_rev       | Mouse           | GGTAGTGAGATACGGGATGGGA         |
| Ythdf1_2_fwd       | Mouse           | GAGCAGTTACTTACCCACC            |
| Ythdf1_2_rev       | Mouse           | TGTTGAGGGAGTCACTGTGAAA         |
| Ythdf1_3_fwd       | Mouse           | CACAGTGACTCCCTCAACAAG          |
| Ythdf1_3_rev       | Mouse           | AGGTGGTAACATCCCCAATCTT         |
| Ythdf2_1_fwd       | Mouse           | GAGCAGAGACCAAAAGGTCAAG         |
| Ythdf2_1_rev       | Mouse           | CTGTGGGCTCAAGTAAGGTTC          |
| Ythdf2_2_fwd       | Mouse           | TATGGACAACCTGAGCAACGGA         |
| Ythdf2_2_rev       | Mouse           | GAGCTGGGTGCATAAGCGTA           |
| Ythdf3_1_fwd       | Mouse           | CGATTCATCAAAAAGATGCTG          |
| Ythdf3_1_rev       | Mouse           | TCTGACATTGGTGGATAGCTG          |
| Ythdf3_2_fwd       | Mouse           | CATAGGGCAACAGAGGAAACAG         |
| Ythdf3_2_rev       | Mouse           | ATCTCCAGCCGTGGACCAT            |
| Sell_PP2_F         | Mouse           | CCCCTTGGGAAACTTCAGCTT          |
| Sell_PP2_R         | Mouse           | ACCATGACGGCTACAGGAATG          |
| Ccr7_1_F           | Mouse           | CAGGTGTGCTTCTGCCAAGAT          |
| Ccr7_1_R           | Mouse           | GGTAGGTATCCGTCATGGTCT          |
| CXCR5_F            | Mouse           | ATGAACTACCCACTAACCCTGG         |

| <b>Primer Name</b>  | <b>Organism</b> | <b>Primer sequence (5'-3')</b> |
|---------------------|-----------------|--------------------------------|
| CXCR5_R             | Mouse           | TGTAGGGGAATCTCCGTGCT           |
| Itgal_PP1_F         | Mouse           | CCAGACTTTTGCTACTGGGAC          |
| Itgal_PP1_R         | Mouse           | GCTTGTTTCGGCAGTGATAGAG         |
| membrane IgM left   | Mouse           | CCTCTTCTACAGCACCACCG           |
| membrane IgM right  | Mouse           | TGGTCTCTGCTGTCCTCCA            |
| secretory IgM left  | Mouse           | CACACTGTACAATGTCTCCCTGA        |
| secretory IgM right | Mouse           | GGTTAGTTTGCATACACAGAGCA        |
